# Supplementary material
Source: publisher figshare collection journal article supplement (https://springernature.figshare.com/ndownloader/files/12941981)
Supplement: Supplementary file [file 12941981]

**Table S2 a: Intramuscular lactate concentrations, groups A, B and C**

| <b>time<br/>(min)</b> | <b>Ringer (A)</b>           |                | <b>Sorbitol (B)</b>         |                | <b>Calcium chloride (C)</b> |                   |
|-----------------------|-----------------------------|----------------|-----------------------------|----------------|-----------------------------|-------------------|
|                       | <b>lactate<br/>(mmol/l)</b> | <b>p value</b> | <b>lactate<br/>(mmol/l)</b> | <b>p value</b> | <b>lactate<br/>(mmol/l)</b> | <b>p value</b>    |
| <b>0</b>              | <b>0.3</b><br>[0.2;0.6]     |                | <b>0.3</b><br>[0.3;0.3]     |                | <b>0.6</b><br>[0.3;0.6]     |                   |
| <b>15</b>             | <b>0.4</b><br>[0.3;0.8]     | >0.9999        | <b>0.3</b><br>[0.3;0.5]     | 0.9998         | <b>1.0</b><br>[0.8;1.5]     | <b>0.0016</b>     |
| <b>30</b>             | <b>0.4</b><br>[0.4;0.6]     | >0.9999        | <b>0.4</b><br>[0.3;0.7]     | 0.7659         | <b>2.0</b><br>[1.4;2.4]     | <b>&lt;0.0001</b> |
| <b>45</b>             | <b>0.4</b><br>[0.3;0.5]     | >0.9999        | <b>0.4</b><br>[0.4;0.5]     | 0.9935         | <b>2.7</b><br>[2.4;3.5]     | <b>&lt;0.0001</b> |
| <b>60</b>             | <b>0.4</b><br>[0.3;0.5]     | >0.9999        | <b>0.4</b><br>[0.4;0.5]     | 0.9935         | <b>3.6</b><br>[3.0;4.3]     | <b>&lt;0.0001</b> |

Intramuscular lactate concentrations measured by microdialysis before and at different time point during continuous application of Ringer solution (A), sorbitol 160 mM (B) and calcium chloride 160 mM (D). Results presented as median and interquartile range. 2-way ANOVA with post hoc Sidak test for multiple comparisons for differences at different time points compared to baseline lactate concentration

**Table S2 b: Intramuscular lactate concentrations, groups D and E**

| <b>time<br/>(min)</b> | <b>Caffeine (D)</b>         |                   | <b>Ringer (E)</b>           |                |
|-----------------------|-----------------------------|-------------------|-----------------------------|----------------|
|                       | <b>lactate<br/>(mmol/l)</b> | <b>p value</b>    | <b>lactate<br/>(mmol/l)</b> | <b>p value</b> |
| <b>0</b>              | <b>0.2</b><br>[0.2;0.3]     |                   | <b>0.3</b><br>[0.2;0.4]     |                |
| <b>15</b>             | <b>0.4</b><br>[0.3;0.4]     | 0.9396            | <b>0.3</b><br>[0.1;0.3]     | 0.9962         |
| <b>30</b>             | <b>1.6</b><br>[0.9;1.9]     | <b>&lt;0.0001</b> | <b>0.4</b><br>[0.2;0.8]     | 0.8109         |
| <b>45</b>             | <b>1.0</b><br>[0.6;1.3]     | <b>0.0004</b>     | <b>0.3</b><br>[0.2;0.5]     | 0.9739         |
| <b>60</b>             | <b>0.4</b><br>[0.2;0.6]     | 0.6695            | <b>0.3</b><br>[0.2;0.4]     | > 0.9999       |

Intramuscular lactate concentrations measured by microdialysis before and at different time points following bolus application of caffeine 160 mM (D) and Ringer solution (E). Results presented as median and interquartile range. 2-way ANOVA with post hoc Sidak test for multiple comparisons for differences at different time points compared to baseline lactate concentration

**Table S2 c: Intramuscular lactate concentrations, groups F and G**

| <b>time<br/>(min)</b> | <b>Halothane (F)</b>        |                   | <b>Soybean oil (G)</b>      |                |
|-----------------------|-----------------------------|-------------------|-----------------------------|----------------|
|                       | <b>lactate<br/>(mmol/l)</b> | <b>p value</b>    | <b>lactate<br/>(mmol/l)</b> | <b>p value</b> |
| <b>0</b>              | <b>0.3</b><br>[0.1;0.3]     |                   | <b>0.4</b><br>[0.2;0.5]     |                |
| <b>15</b>             | <b>1.1</b><br>[0.7;1.4]     | 0.1088            | <b>0.3</b><br>[0.2;0.4]     | >0.9999        |
| <b>30</b>             | <b>4.7</b><br>[4.3;6.3]     | <b>&lt;0.0001</b> | <b>0.5</b><br>[0.4;0.5]     | 0.9970         |
| <b>45</b>             | <b>1.1</b><br>[0.7;2.6]     | <b>0.0031</b>     | <b>0.3</b><br>[0.3;0.5]     | >0.9999        |
| <b>60</b>             | <b>0.5</b><br>[0.4;0.8]     | 0.8987            | <b>0.4</b><br>[0.3;0.5]     | >0.9999        |

Intramuscular lactate concentrations measured by microdialysis before and at different time points following bolus application of halothane 10 %vol (F) and soybean oil (G). Results presented as median and interquartile range. 2-way ANOVA with post hoc Sidak test for multiple comparisons for differences at different time points compared to baseline lactate concentration
